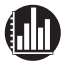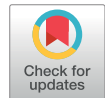

# Plasma Alkylresorcinol Metabolite, a Biomarker of Whole-Grain Wheat and Rye Intake, and Risk of Type 2 Diabetes and Impaired Glucose Regulation in a Chinese Population

*Diabetes Care* 2018;41:440–445 | <https://doi.org/10.2337/dc17-1570>

Taoping Sun,<sup>1,2</sup> Ying Rong,<sup>3</sup> Xiaoli Hu,<sup>1,2</sup>  
Yalun Zhu,<sup>1,2</sup> Hao Huang,<sup>1,2</sup>  
Liangkai Chen,<sup>1,2</sup> Peiyun Li,<sup>1,2</sup>  
Shuzhen Li,<sup>1,2</sup> Wei Yang,<sup>1,2</sup>  
Jinquan Cheng,<sup>4</sup> Xuefeng Yang,<sup>1,2</sup>  
Ping Yao,<sup>1,2</sup> Frank B. Hu,<sup>5</sup> and  
Liegang Liu<sup>1,2</sup>

## OBJECTIVE

To examine the association of plasma alkylresorcinol metabolite 3-(3,5-dihydroxyphenyl)-1-propanoic acid (DHPPA), a biomarker of whole-grain wheat and rye intake, with type 2 diabetes (T2D) and impaired glucose regulation (IGR) in a Chinese population.

## RESEARCH DESIGN AND METHODS

A total of 1,060 newly diagnosed T2D patients, 736 newly diagnosed IGR patients, and 1,443 control subjects with normal glucose tolerance were recruited in the case-control study. Plasma DHPPA concentrations were determined by high-performance liquid chromatography–tandem mass spectroscopy. Multivariate logistic regression analysis was used to evaluate the independent association of plasma DHPPA concentrations with the likelihood of T2D and IGR.

## RESULTS

After adjustment for age, sex, BMI, and family history of diabetes, the odds ratios (95% CI) of T2D and IGR were 0.57 (0.45, 0.73) and 0.66 (0.50, 0.85), respectively, comparing the lowest with the highest quartile of plasma DHPPA concentrations. Further adjustment for current smoking status, current alcohol consumption, physical activity, history of hypertension, and educational level did not change the observed association materially. Similar results were also obtained in T2D and IGR groups combined. The inverse association of plasma DHPPA with T2D persisted in stratified analyses according to age, sex, BMI, current smoking status, current alcohol consumption, physical activity, family history of diabetes, and history of hypertension.

## CONCLUSIONS

These findings suggested that higher plasma DHPPA concentrations were associated with lower odds of T2D and IGR. Further studies are warranted to confirm these findings in prospective cohorts.

<sup>1</sup>Department of Nutrition and Food Hygiene, Hubei Key Laboratory of Food Nutrition and Safety, School of Public Health, Tongji Medical College, Huazhong University of Science and Technology, Wuhan, China

<sup>2</sup>Ministry of Education Key Laboratory of Environment and Health, School of Public Health, Tongji Medical College, Huazhong University of Science and Technology, Wuhan, China

<sup>3</sup>Department of Nutrition, Shandong Provincial Hospital, Shandong University, Jinan, China

<sup>4</sup>Department of Microbiology, Shenzhen Center for Disease Control and Prevention, Shenzhen, China

<sup>5</sup>Department of Nutrition, Harvard T.H. Chan School of Public Health, Boston, MA

Corresponding authors: Liegang Liu, [lgliu@mails.tjmu.edu.cn](mailto:lgliu@mails.tjmu.edu.cn), and Frank B. Hu, [frank.hu@channing.harvard.edu](mailto:frank.hu@channing.harvard.edu).

Received 29 July 2017 and accepted 2 November 2017.

This article contains Supplementary Data online at <http://care.diabetesjournals.org/lookup/suppl/doi:10.2337/dc17-1570/-/DC1>.

T.S. and Y.R. contributed equally to this work.

© 2017 by the American Diabetes Association. Readers may use this article as long as the work is properly cited, the use is educational and not for profit, and the work is not altered. More information is available at <http://www.diabetesjournals.org/content/license>.

The prevalence of type 2 diabetes (T2D) has dramatically increased over the past few decades worldwide (1), leading to considerable increases in related mortality and economic cost. Although there are several modifiable risk factors for T2D, diet is clearly of paramount importance (2).

Recently, whole-grain intake has been confirmed to have an inverse association with the risk of developing T2D in several prospective cohort studies (3–5). A meta-analysis on nutritional studies (6) also found beneficial effects of whole grains on several cardiometabolic risk factors such as fasting glucose, blood insulin, and blood lipids. The abundance of dietary fiber, minerals, vitamins, and phytochemicals may contribute to the protective effects (7,8).

Available prospective studies on the association between whole grains and risk of T2D have generally assessed whole-grain intake through self-administered food frequency questionnaires. However, it is always challenging in free-living populations to accurately measure food and nutrient intakes, especially for whole-grain intake because of the limitations of whole-grain food composition data (9,10). Inaccurate identification of different whole-grain constituents as well as incorrect estimation of whole-grain foods can lead to measurement errors and underestimates of health benefits of whole grains (11). These together make dietary biomarkers significant as additional estimates of dietary intake.

Alkylresorcinols are phenolic lipids abundant in the outer layers of rye and wheat grain, but absent in highly refined white flour and most other cereal products (12,13). In human subjects, intact alkylresorcinols and their main metabolites (3,5-dihydroxybenzoic acid, DHBA; 3-(3,5-dihydroxyphenyl)-1-propanoic acid, DHPPA) are measurable in plasma (14–16). Recently, they have been suggested as biomarkers of whole-grain wheat and rye intake in epidemiological studies (17–19). Considering that the estimated half-life is significantly longer for DHPPA (16.3 h) than DHBA (10.1 h) and alkylresorcinols (5 h) (20), plasma DHPPA appears to be a good and specific biomarker of whole-grain wheat and rye intake (14,17,21).

In this study, we aimed to examine the association between plasma DHPPA, a biomarker of whole-grain wheat and rye intake, and risk of T2D and impaired

glucose regulation (IGR) in a case-control study conducted among a Chinese Han population.

## RESEARCH DESIGN AND METHODS

### Study Population and Data Collection

This study population consisted of 3,239 participants: 1,060 newly diagnosed T2D patients, 736 newly diagnosed IGR patients, and 1,443 control subjects with normal glucose tolerance (NGT). All cases were consecutively recruited from individuals who, for the first time, received a diagnosis of T2D in the Department of Endocrinology, Tongji Hospital, Tongji Medical College, Wuhan, China, from February 2012 to December 2015. Concomitantly, we recruited control subjects from the general population undergoing a routine health checkup in the same hospital. All cases were frequency matched with control subjects based on sex and age ( $\pm 5$  years). The inclusion criteria were age  $\geq 30$  years, BMI  $< 40$  kg/m<sup>2</sup>, and no history of a diagnosis of diabetes or receiving pharmacological treatment for hyperlipidemia and hypertension. Subjects with clinically significant neurological, endocrinological, or other systemic diseases, as well as those with acute illness and chronic inflammatory or infective diseases, were excluded from the study. All the participants enrolled were of Chinese Han ethnicity.

The diagnostic criteria for IGR and T2D were recommended by the World Health Organization in 1999, incorporating both fasting plasma glucose and a 2-h oral glucose tolerance test (75 g of glucose) (22). IGR was defined as impaired fasting glucose (fasting plasma glucose  $\geq 6.1$  mmol/L and  $< 7.0$  mmol/L, and 2-h postglucose load  $< 7.8$  mmol/L) and/or impaired glucose tolerance (fasting plasma glucose  $< 7.0$  mmol/L, and 2-h postglucose load  $\geq 7.8$  mmol/L and  $< 11.1$  mmol/L). T2D was confirmed when fasting plasma glucose was  $\geq 7.0$  mmol/L and/or 2-h postglucose load was  $\geq 11.1$  mmol/L.

Basic characteristics, including age, sex, smoking status, alcohol consumption, physical activity, history of hypertension, family history of diabetes, and educational level, were obtained by a standardized questionnaire. Anthropometric measurements such as weight (kg) and height (cm) were measured by trained project staff. BMI was calculated as weight (kg)/square of height (m<sup>2</sup>). All participants underwent a physical examination in the

morning after an overnight fast and venous blood samples drawn from the antecubital vein were collected. This study was approved by the ethics committee of Tongji Medical College (Huazhong University of Science and Technology, Wuhan, China). All participants provided written informed consent.

### Laboratory Measurements

The collected blood samples were separated for plasma within 1 h and then stored at  $-80^{\circ}\text{C}$  until analysis. Plasma levels of biochemical parameters, including fasting plasma glucose, 2-h postglucose load, total cholesterol, triglyceride, HDL cholesterol, and LDL cholesterol, were measured as previously described (23).

Plasma DHPPA was analyzed by high-performance liquid chromatography–tandem mass spectroscopy (LC-MS/MS) (AB Sciex QTRAP 4500; Applied Biosystems, Foster City, CA). Briefly, 50  $\mu\text{L}$  of plasma sample was spiked with the internal standard (1 ng of syringic acid). The sample was hydrolyzed overnight at  $37^{\circ}\text{C}$  with  $\beta$ -glucuronidase/sulfatase (16) and then extracted with acetonitrile. After centrifuge, the supernatant was collected, and the procedure was repeated once. The combined supernatants were evaporated to dryness under vacuum at  $35^{\circ}\text{C}$ . The residue was then reconstituted in 50  $\mu\text{L}$  of solvent (acetonitrile/water, 1:1, v/v) for LC-MS/MS analysis. Four replicate quality control samples were analyzed in each batch ( $n = 48$ ). The within- and between-batch coefficients of variation were both  $< 10\%$ . Validation of this method is described in the Supplementary Data.

### Statistical Analysis

The differences in plasma DHPPA and basic characteristics between case and control subjects were assessed using Mann-Whitney *U* test (continuous variables, skewed distribution), Student *t* test (continuous variables, normal distribution), and  $\chi^2$  test (categorical variables). Multiple logistic regression analysis was used to estimate the association between plasma DHPPA concentration and risk of T2D and IGR. To calculate the odds ratios (ORs) for T2D and IGR, plasma DHPPA concentrations were categorized in quartiles according to the control group: quartile 1,  $< 6.56$  nmol/L; quartile 2, 6.56 to  $< 10.21$  nmol/L; quartile 3, 10.21 to  $< 17.98$  nmol/L; and quartile 4,  $\geq 17.98$  nmol/L. The regression models were

adjusted for potential confounders including age, sex, BMI, family history of diabetes, history of hypertension, current smoking status (yes/no), current alcohol consumption (yes/no), educational level (none or elementary school, middle school, high school, or college), and vigorous physical activity (at least once/week or no). Because of skewed distribution of plasma DHPPA levels, the normal distribution was approximated by logarithmic transformation. We further explored the potential nonlinear relationship between plasma DHPPA and T2D using a restricted cubic spline with four knots at the 20th, 40th, 60th, and 80th percentiles of ln (plasma DHPPA concentrations). To estimate the consistency of the findings according to participant characteristics, we conducted stratified analyses by sex, age (<55 and  $\geq 55$  years), BMI (BMI <24 and  $\geq 24$  kg/m<sup>2</sup>) (24), current smoking status, current alcohol consumption, physical activity, family history of diabetes, and history of hypertension. Interaction tests with multiplicative terms were also performed to determine whether risks differed between the subgroups. Statistical analyses were done with SPSS 17.0 (SPSS Inc., Chicago, IL) and Stata/SE 12.0 (StataCorp LP, College Station, TX). *P* values presented are two-tailed with a significance level of 0.05.

## RESULTS

Demographic and clinical characteristics of the 3,239 participants with T2D, IGR, and NGT are summarized in Table 1. Plasma DHPPA concentrations were significantly lower in T2D and IGR patients compared with the control subjects (median: 9.06 nmol/L, 9.66 nmol/L, and 10.21 nmol/L, respectively, *P* < 0.005). In addition, T2D and IGR cases had a higher BMI and greater prevalence of family history of diabetes and history of hypertension. As expected, higher plasma levels of total cholesterol, triglyceride, and fasting plasma glucose but lower HDL cholesterol levels were observed in T2D and IGR case subjects than in the control subjects (*P* < 0.005).

Table 2 demonstrates logistic regression results for T2D and IGR associated with plasma DHPPA concentrations, categorized into quartiles according to the distribution in control subjects. After adjustment for age, sex, BMI, and family history of diabetes, the ORs (95% CI) of T2D and IGR were 0.57 (0.45, 0.73) and

0.66 (0.50, 0.85), respectively, comparing the highest with the lowest quartile of plasma DHPPA concentrations. Further adjustment for current smoking status, current alcohol consumption, physical activity, history of hypertension, and educational level did not change the observed association materially. Similar results were also obtained in T2D and IGR groups combined. We further conducted analyses stratified by categories of the potential confounding factors. The inverse association of plasma DHPPA with T2D was consistently observed across all categories except when stratifying by alcohol habits and family history of diabetes (Table 3). The association seemed to be stronger in subjects without smoking or alcohol drinking habits. In this study, tests for multiplicative interaction were not statistically significant.

In the spline regression models, the OR of T2D decreased significantly with increasing ln-transformed DHPPA at less than 2.05 (7.77 nmol/L plasma DHPPA), followed by a slight plateau (Fig. 1). The nonlinear spline terms were statistically significant (*P* = 0.0009), suggesting a potential nonlinear relationship between plasma DHPPA levels and T2D.

## CONCLUSIONS

To the best of our knowledge, this was the first study to examine the relationship between plasma DHPPA concentration as a biomarker of whole-grain intake and risk of T2D and IGR. We found that higher plasma DHPPA concentration was associated with lower ORs of T2D. Adjustment for potential confounding factors did not affect the above results materially. Plasma DHPPA concentration was also inversely associated with risk of IGR, but this association was somewhat attenuated.

Our findings are suggestive of an inverse association of whole-grain intake with T2D risk, which is in accordance with previous epidemiological studies using food frequency questionnaires (3,5,25). A meta-analysis of cohort studies also found a consistent inverse association between whole-grain intake and risk of T2D (32% reduction in the relative risk per three servings per day) (26). A recent study in a Scandinavian population reported a nonsignificant association between plasma alkylresorcinols concentration as a biomarker of whole-grain intake and risk of T2D (27). However,

whole-grain intake in that population was much higher than other populations (28). The nonsignificant association might result from a lack of the increased benefits of whole-grain intake when increasing intake from intermediate or high levels (5,25). In our population, plasma DHPPA concentration was significantly lower compared with that in European populations (21.9 nmol/L in elderly Swedish men [19] and 50.6 nmol/L in German men and women [29]). This could be attributed to dietary patterns in Asian countries where rice and wheat are the staple foods. Additionally, the advance of grain-processing technology made possible large-scale production of refined grains in Asian countries (30). Daily whole-grain intake in China was estimated to have decreased from 104 g in 1982 to 24 g in 2002 (31), and it is likely to have continued to decline since 2002. Similar results were also reported by a study in Singapore that suggested low intake of whole-grain wheat among Singaporeans (32).

The inverse association between plasma DHPPA and T2D risk may be explained by other healthy lifestyle factors associated with high whole-grain intake. However, the inverse association persisted in multiple logistic regression models that adjusted for these known risk factors. Moreover, these findings remained robust among individuals with a greater BMI ( $\geq 24$  kg/m<sup>2</sup>) and among nonsmokers, nondrinkers, and individuals with lower physical activity levels. Certain mechanisms have been suggested to be responsible for the observed inverse association. Whole-grain foods higher in insoluble fiber can improve insulin sensitivity and lower insulin secretion as assessed by insulin clamp (33,34). Additionally, minerals, vitamins, and phytochemicals that whole grains are rich in may also contribute to the inverse association between whole-grain intake and T2D (7,35).

In this study, there was evidence of a nonlinear inverse association between plasma DHPPA and T2D, with a steep reduction in the risk at the lower range of plasma DHPPA concentration. This finding is in line with the results from a previous meta-analysis of cohort studies, which indicates a consistent inverse association between whole-grain intake and risk of T2D and that the relative risk reduction was nonlinear, with most of the reduction observed at a lower range of

**Table 1—Demographic and clinical characteristics of NGT, T2D, and IGR groups**

|                                                      | NGT ( <i>n</i> = 1,443) | T2D ( <i>n</i> = 1,060) | IGR ( <i>n</i> = 736) | <i>P</i> value |             |
|------------------------------------------------------|-------------------------|-------------------------|-----------------------|----------------|-------------|
|                                                      |                         |                         |                       | T2D vs. NGT    | IGR vs. NGT |
| Age (years)                                          | 52.78 (11.04)           | 51.56 (10.75)           | 53.33 (11.08)         | 0.002          | 0.254       |
| Male, <i>n</i> (%)                                   | 854 (59.18)             | 625 (58.96)             | 458 (62.23)           | 0.912          | 0.169       |
| BMI (kg/m <sup>2</sup> )                             | 23.47 (3.09)            | 25.41 (3.43)            | 24.82 (3.36)          | <0.001         | <0.001      |
| Fasting plasma glucose (mmol/L)                      | 5.47 (0.39)             | 9.27 (3.30)             | 6.28 (0.43)           | <0.001         | <0.001      |
| Triglyceride (mmol/L)                                | 1.28 (0.85–1.99)        | 1.59 (0.99–2.54)        | 1.38 (0.93–2.12)      | <0.001         | 0.003       |
| Total cholesterol (mmol/L)                           | 4.40 (3.44–5.37)        | 4.75 (4.09–5.47)        | 4.68 (3.68–5.47)      | <0.001         | <0.001      |
| HDL cholesterol (mmol/L)                             | 1.36 (1.10–1.65)        | 1.09 (0.87–1.43)        | 1.23 (0.98–1.56)      | <0.001         | <0.001      |
| LDL cholesterol (mmol/L)                             | 2.73 (2.20–3.38)        | 2.86 (2.04–3.78)        | 2.81 (2.00–3.56)      | 0.009          | 0.912       |
| Hypertension, <i>n</i> (%)                           | 279 (19.33)             | 382 (36.04)             | 236 (32.07)           | <0.001         | <0.001      |
| Current smoker, <i>n</i> (%)                         | 480 (33.26)             | 376 (35.47)             | 260 (35.33)           | 0.250          | 0.336       |
| Current drinker, <i>n</i> (%)                        | 424 (29.38)             | 373 (35.19)             | 276 (37.50)           | 0.002          | <0.001      |
| Family history of diabetes, <i>n</i> (%)             | 105 (7.28)              | 255 (24.06)             | 110 (14.95)           | <0.001         | <0.001      |
| Vigorous activity (at least once/week), <i>n</i> (%) | 547 (37.91)             | 373 (35.19)             | 277 (37.64)           | 0.163          | 0.902       |
| Educational level                                    |                         |                         |                       | <0.001         | <0.001      |
| None or elementary school                            | 352 (24.39)             | 221 (20.85)             | 180 (24.46)           |                |             |
| Middle school                                        | 538 (37.28)             | 352 (33.21)             | 270 (36.68)           |                |             |
| High school                                          | 474 (32.85)             | 373 (35.19)             | 212 (28.80)           |                |             |
| College                                              | 79 (5.47)               | 114 (10.75)             | 74 (10.05)            |                |             |
| Plasma DHPPA (nmol/L)                                | 10.21 (6.56–17.98)      | 9.06 (5.30–15.78)       | 9.66 (5.82–15.62)     | <0.001         | 0.002       |

Data are presented as *n* (%) for categorical data, mean (SD) for parametrically distributed data, or median (interquartile range) for nonparametrically distributed data.

whole-grain intake (26). In the spline regression model, a slightly raised curve was observed at intermediate DHPPA concentration. This may be due to chance or random statistical variations. In addition, refined-grain foods rather than whole grains are mainly consumed in this population, and we could not exclude the possibility that the participants in different quartiles had different amounts of refined-grain intake. Unfortunately, the data on refined-grain intake versus

whole-grain intake was not available in this study. Moreover, although we carefully adjusted or matched on the confounding factors such as sex, age, BMI, smoking status, and alcohol consumption, residual confounding could not be ruled out.

Our study has several strengths. Plasma concentration of alkylresorcinol metabolites is a novel and independent biomarker of whole-grain intake with modest long-term reproducibility (29), and it has been used in several studies

to estimate the effect of whole-grain wheat and rye on human health (19,36). Moreover, participants in this study were confined to the newly diagnosed to avoid possible changes in diet and lifestyle, which may distort the association between whole-grain intake and T2D risk. Furthermore, despite the relatively low DHPPA concentrations in this population, most of the plasma DHPPA values (98.4%) were detectable by the sensitive, reliable, and validated LC-MS/MS method. Finally,

**Table 2—ORs (95% CI) of T2D and IGR, by quartiles of plasma DHPPA concentrations**

|                                 | Quartile of plasma DHPPA concentrations (nmol/L) |                    |                     |                   | <i>P</i> for trend |
|---------------------------------|--------------------------------------------------|--------------------|---------------------|-------------------|--------------------|
|                                 | Q1 (referent), <6.56                             | Q2, 6.56 to <10.21 | Q3, 10.21 to <17.98 | Q4, ≥17.98        |                    |
| T2D vs. NGT                     |                                                  |                    |                     |                   |                    |
| Case/control subjects, <i>n</i> | 376/361                                          | 207/363            | 273/358             | 204/361           |                    |
| Crude OR (95% CI)               | 1                                                | 0.55 (0.44, 0.68)  | 0.73 (0.59, 0.91)   | 0.54 (0.43, 0.68) | <0.0001            |
| Adjusted OR* (95% CI)           | 1                                                | 0.57 (0.45, 0.73)  | 0.78 (0.62, 0.98)   | 0.57 (0.45, 0.73) | 0.0002             |
| Adjusted OR† (95% CI)           | 1                                                | 0.58 (0.45, 0.74)  | 0.76 (0.60, 0.96)   | 0.56 (0.44, 0.72) | 0.0001             |
| IGR vs. NGT                     |                                                  |                    |                     |                   |                    |
| Case/control subjects, <i>n</i> | 221/361                                          | 170/363            | 196/358             | 149/361           |                    |
| Crude OR (95% CI)               | 1                                                | 0.76 (0.60, 0.98)  | 0.89 (0.70, 1.14)   | 0.67 (0.52, 0.87) | 0.0099             |
| Adjusted OR* (95% CI)           | 1                                                | 0.74 (0.57, 0.95)  | 0.90 (0.70, 1.15)   | 0.66 (0.50, 0.85) | 0.0108             |
| Adjusted OR† (95% CI)           | 1                                                | 0.77 (0.59, 1.00)  | 0.90 (0.70, 1.15)   | 0.66 (0.51, 0.86) | 0.0088             |
| T2D&IGR vs. NGT                 |                                                  |                    |                     |                   |                    |
| Case/control subjects, <i>n</i> | 597/361                                          | 377/363            | 469/358             | 353/361           |                    |
| Crude OR (95% CI)               | 1                                                | 0.63 (0.52, 0.76)  | 0.79 (0.66, 0.96)   | 0.59 (0.49, 0.72) | <0.0001            |
| Adjusted OR* (95% CI)           | 1                                                | 0.62 (0.51, 0.77)  | 0.82 (0.67, 1.00)   | 0.59 (0.48, 0.73) | 0.0001             |
| Adjusted OR† (95% CI)           | 1                                                | 0.64 (0.52, 0.78)  | 0.81 (0.66, 0.99)   | 0.59 (0.48, 0.73) | 0.0001             |

T2D&IGR, T2D and IGR groups combined. \*Model 1, adjusted for age, sex, BMI, and family history of diabetes. †Model 2, adjusted for Model 1, current smoking status, current alcohol consumption, physical activity, history of hypertension, and educational level.

**Table 3—Stratified analyses of T2D risk and plasma DHPPA concentrations by sex, age, BMI, current smoking status, current alcohol consumption, physical activity, family history of diabetes, and history of hypertension**

| Group (n)                  | Quartile of plasma DHPPA concentrations (nmol/L) |                    |                     |                   | P value for interaction |
|----------------------------|--------------------------------------------------|--------------------|---------------------|-------------------|-------------------------|
|                            | Q1 (referent), <6.56                             | Q2, 6.56 to <10.21 | Q3, 10.21 to <17.98 | Q4, ≥17.98        |                         |
| Sex                        |                                                  |                    |                     |                   | 0.407                   |
| Male (1,479)               | 1                                                | 0.58 (0.42, 0.80)  | 0.88 (0.65, 1.18)   | 0.66 (0.48, 0.91) |                         |
| Female (1,024)             | 1                                                | 0.58 (0.40, 0.84)  | 0.68 (0.47, 0.97)   | 0.47 (0.32, 0.68) |                         |
| Age, years                 |                                                  |                    |                     |                   | 0.953                   |
| <55 (1,363)                | 1                                                | 0.60 (0.43, 0.83)  | 0.80 (0.59, 1.08)   | 0.54 (0.39, 0.75) |                         |
| ≥55 (1,140)                | 1                                                | 0.58 (0.40, 0.85)  | 0.81 (0.57, 1.15)   | 0.61 (0.42, 0.88) |                         |
| BMI, kg/m <sup>2</sup>     |                                                  |                    |                     |                   | 0.438                   |
| <24 (1,221)                | 1                                                | 0.67 (0.47, 0.96)  | 0.81 (0.58, 1.13)   | 0.53 (0.36, 0.76) |                         |
| ≥24 (1,282)                | 1                                                | 0.51 (0.37, 0.70)  | 0.76 (0.56, 1.05)   | 0.61 (0.44, 0.85) |                         |
| Current smoking            |                                                  |                    |                     |                   | 0.645                   |
| Yes (856)                  | 1                                                | 0.61 (0.40, 0.93)  | 0.82 (0.55, 1.21)   | 0.71 (0.47, 1.07) |                         |
| No (1,647)                 | 1                                                | 0.55 (0.41, 0.74)  | 0.76 (0.57, 1.01)   | 0.51 (0.38, 0.69) |                         |
| Current drinking           |                                                  |                    |                     |                   | 0.067                   |
| Yes (797)                  | 1                                                | 0.69 (0.46, 1.08)  | 1.00 (0.67, 1.50)   | 0.92 (0.60, 1.41) |                         |
| No (1,706)                 | 1                                                | 0.54 (0.40, 0.72)  | 0.70 (0.53, 0.93)   | 0.46 (0.34, 0.61) |                         |
| Vigorous activity          |                                                  |                    |                     |                   | 0.383                   |
| At least once/week (920)   | 1                                                | 0.50 (0.33, 0.74)  | 0.87 (0.60, 1.28)   | 0.68 (0.46, 1.01) |                         |
| No (1,583)                 | 1                                                | 0.62 (0.46, 0.84)  | 0.74 (0.56, 0.99)   | 0.53 (0.39, 0.71) |                         |
| Family history of diabetes |                                                  |                    |                     |                   | 0.822                   |
| Yes (360)                  | 1                                                | 0.67 (0.34, 1.32)  | 0.68 (0.36, 1.28)   | 0.53 (0.27, 1.04) |                         |
| No (2,143)                 | 1                                                | 0.56 (0.43, 0.72)  | 0.80 (0.62, 1.02)   | 0.58 (0.45, 0.75) |                         |
| History of hypertension    |                                                  |                    |                     |                   | 0.060                   |
| Yes (661)                  | 1                                                | 0.87 (0.55, 1.39)  | 0.93 (0.59, 1.46)   | 0.53 (0.34, 0.83) |                         |
| No (1,842)                 | 1                                                | 0.48 (0.36, 0.63)  | 0.74 (0.57, 0.96)   | 0.59 (0.45, 0.78) |                         |

Data are OR (95% CI). The multivariate model was adjusted for age, sex, BMI, and family history of diabetes.

because of the apparent long half-life of approximately 16.3 h (17), plasma DHPPA as a biomarker of whole-grain intake has advantages over alkylresorcinols ( $t_{1/2} = 5$  h),

given that blood samples are usually taken after overnight fasting.

Several limitations should also be acknowledged. First, the case-control study

design did not allow us to establish a causal relationship, and the likelihood of recall and selection biases could not be excluded. Second, the lack of information on dietary factors (especially refined-grain intake) and socioeconomic factors precluded us from assessing their confounding effects on the results. Third, plasma levels of alkylresorcinol metabolites can be influenced by between-subject differences in metabolism (29,37), which may distort the association under investigation. This problem is further accentuated when intake of whole grains is irregular. Finally, plasma DHPPA is only a biomarker of whole-grain wheat and rye intake, meaning that intakes of other whole grains such as brown rice and corn, which are also consumed in this population, could not be assessed using this biomarker.

In conclusion, we observed that higher plasma DHPPA concentrations were associated with lower ORs of T2D and IGR. Further studies are warranted to confirm our results in prospective cohorts.

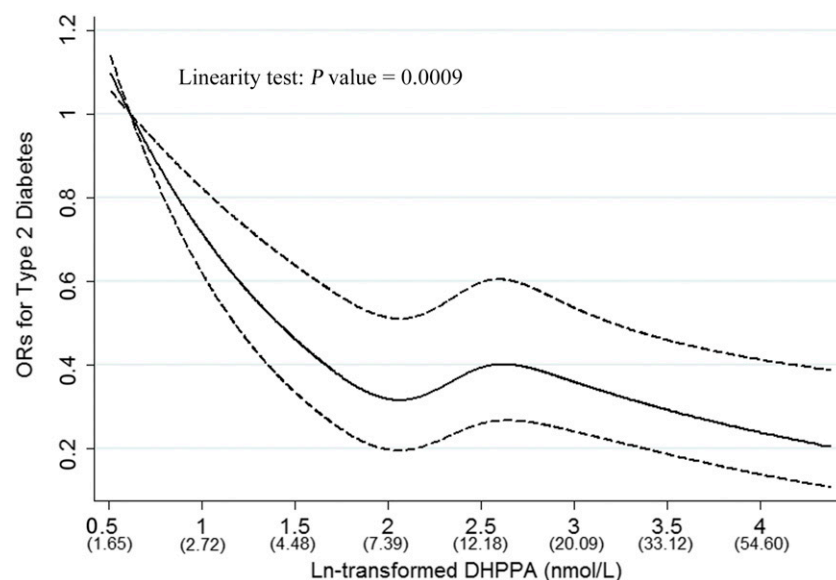

**Figure 1**—Representation of restricted cubic spline logistic regression models for ln-transformed DHPPA and risk of T2D. Knots were placed at the 20th, 40th, 60th, and 80th percentiles of ln (plasma DHPPA concentrations). Solid line, OR as a function of ln-transformed DHPPA adjusted for age, sex, BMI, family history of diabetes; dashed lines, 95% CIs.

**Funding.** This study was supported by the Integrated Innovative Team for Major Human Diseases Program of Tongji Medical College,

Huazhong University of Science and Technology (HUST); Fundamental Research Funds for the Central Universities (HUST 2016YXMS219); and Technique Innovation Program (Major Program) of Hubei Province of China (2016ACA136).

**Duality of Interest.** No potential conflicts of interest relevant to this article were reported.

**Author Contributions.** T.S., Y.R., and L.L. designed and conducted the research, analyzed the data, and wrote the manuscript. X.H., Y.Z., H.H., L.C., P.L., and S.L. performed the experiments. W.Y. and X.Y. commented on drafts. J.C., P.Y., and F.B.H. designed the study and edited the manuscript. L.L. is the guarantor of this work and, as such, had full access to all the data in the study and takes responsibility for the integrity of the data and the accuracy of the data analysis.

## References

- Wild S, Roglic G, Green A, Sicree R, King H. Global prevalence of diabetes: estimates for the year 2000 and projections for 2030. *Diabetes Care* 2004;27:1047–1053
- Ley SH, Hamdy O, Mohan V, Hu FB. Prevention and management of type 2 diabetes: dietary components and nutritional strategies. *Lancet* 2014;383:1999–2007
- Montonen J, Knekt P, Järvinen R, Aromaa A, Reunanen A. Whole-grain and fiber intake and the incidence of type 2 diabetes. *Am J Clin Nutr* 2003;77:622–629
- de Munter JS, Hu FB, Spiegelman D, Franz M, van Dam RM. Whole grain, bran, and germ intake and risk of type 2 diabetes: a prospective cohort study and systematic review. *PLoS Med* 2007;4:e261
- Liu S, Manson JE, Stampfer MJ, et al. A prospective study of whole-grain intake and risk of type 2 diabetes mellitus in US women. *Am J Public Health* 2000;90:1409–1415
- Ye EQ, Chacko SA, Chou EL, Kugizaki M, Liu S. Greater whole-grain intake is associated with lower risk of type 2 diabetes, cardiovascular disease, and weight gain. *J Nutr* 2012;142:1304–1313
- Slavin J. Why whole grains are protective: biological mechanisms. *Proc Nutr Soc* 2003;62:129–134
- Okarter N, Liu RH. Health benefits of whole grain phytochemicals. *Crit Rev Food Sci Nutr* 2010;50:193–208
- Freedman LS, Schatzkin A, Midthune D, Kipnis V. Dealing with dietary measurement error in nutritional cohort studies. *J Natl Cancer Inst* 2011;103:1086–1092
- Westerterp KR, Goris AH. Validity of the assessment of dietary intake: problems of misreporting. *Curr Opin Clin Nutr Metab Care* 2002;5:489–493
- van Dam RM, Hu FB. Are alkylresorcinols accurate biomarkers for whole grain intake? *Am J Clin Nutr* 2008;87:797–798
- Ross AB, Kamal-Eldin A, Åman P. Dietary alkylresorcinols: absorption, bioactivities, and possible use as biomarkers of whole-grain wheat and rye-rich foods. *Nutr Rev* 2004;62:81–95
- Ross AB, Shepherd MJ, Schüpphaus M, et al. Alkylresorcinols in cereals and cereal products. *J Agric Food Chem* 2003;51:4111–4118
- Aubertin-Leheudre M, Koskela A, Samaletdin A, Adlercreutz H. Plasma alkylresorcinol metabolites as potential biomarkers of whole-grain wheat and rye cereal fibre intakes in women. *Br J Nutr* 2010;103:339–343
- Linko AM, Parikka K, Wähälä K, Adlercreutz H. Gas chromatographic-mass spectrometric method for the determination of alkylresorcinols in human plasma. *Anal Biochem* 2002;308:307–313
- Koskela A, Samaletdin A, Aubertin-Leheudre M, Adlercreutz H. Quantification of alkylresorcinol metabolites in plasma by high-performance liquid chromatography with coulometric electrode array detection. *J Agric Food Chem* 2008;56:7678–7681
- Söderholm PP, Koskela AH, Lundin JE, Tikkanen MJ, Adlercreutz HC. Plasma pharmacokinetics of alkylresorcinol metabolites: new candidate biomarkers for whole-grain rye and wheat intake. *Am J Clin Nutr* 2009;90:1167–1171
- Kyrø C, Olsen A, Landberg R, et al. Plasma alkylresorcinols, biomarkers of whole-grain wheat and rye intake, and incidence of colorectal cancer. *J Natl Cancer Inst* 2014;106:djt352
- Drake I, Sonestedt E, Gullberg B, et al. Plasma alkylresorcinol metabolites as biomarkers for whole-grain intake and their association with prostate cancer: a Swedish nested case-control study. *Cancer Epidemiol Biomarkers Prev* 2014;23:73–83
- Landberg R, Linko AM, Kamal-Eldin A, Vessby B, Adlercreutz H, Åman P. Human plasma kinetics and relative bioavailability of alkylresorcinols after intake of rye bran. *J Nutr* 2006;136:2760–2765
- Aubertin-Leheudre M, Koskela A, Samaletdin A, Adlercreutz H. Responsiveness of urinary and plasma alkylresorcinol metabolites to rye intake in Finnish women. *Cancers (Basel)* 2010;2:513–522
- Alberti KG, Zimmet PZ. Definition, diagnosis and classification of diabetes mellitus and its complications. Part 1: diagnosis and classification of diabetes mellitus. Provisional report of a WHO consultation. *Diabet Med* 1998;15:539–553
- Song F, Jia W, Yao Y, et al. Oxidative stress, antioxidant status and DNA damage in patients with impaired glucose regulation and newly diagnosed type 2 diabetes. *Clin Sci (Lond)* 2007;112:599–606
- Zhou BF; Cooperative Meta-Analysis Group of the Working Group on Obesity in China. Predictive values of body mass index and waist circumference for risk factors of certain related diseases in Chinese adults—study on optimal cut-off points of body mass index and waist circumference in Chinese adults. *Biomed Environ Sci* 2002;15:83–96
- Fung TT, Hu FB, Pereira MA, et al. Whole-grain intake and the risk of type 2 diabetes: a prospective study in men. *Am J Clin Nutr* 2002;76:535–540
- Aune D, Norat T, Romundstad P, Vatten LJ. Whole grain and refined grain consumption and the risk of type 2 diabetes: a systematic review and dose-response meta-analysis of cohort studies. *Eur J Epidemiol* 2013;28:845–858
- Biskup I, Kyrø C, Marklund M, et al. Plasma alkylresorcinols, biomarkers of whole-grain wheat and rye intake, and risk of type 2 diabetes in Scandinavian men and women. *Am J Clin Nutr* 2016;104:88–96
- Kyrø C, Skeie G, Dragsted LO, et al. Intake of whole grains in Scandinavia is associated with healthy lifestyle, socio-economic and dietary factors. *Public Health Nutr* 2011;14:1787–1795
- Montonen J, Landberg R, Kamal-Eldin A, et al. Reliability of fasting plasma alkylresorcinol metabolites concentrations measured 4 months apart. *Eur J Clin Nutr* 2012;66:968–970
- Miller G, Prakash A, Decker E. *Whole-Grain Foods in Health and Disease*. St. Paul, MN, American Association of Cereal Chemists, 2002
- Ge K. The transition of Chinese dietary guidelines and food guide pagoda. *Asia Pac J Clin Nutr* 2011;20:439–446
- Ross AB, Colega MT, Lim AL, et al. Whole grain intake, determined by dietary records and plasma alkylresorcinol concentrations, is low among pregnant women in Singapore. *Asia Pac J Clin Nutr* 2015;24:674–682
- Fukagawa NK, Anderson JW, Hageman G, Young VR, Minaker KL. High-carbohydrate, high-fiber diets increase peripheral insulin sensitivity in healthy young and old adults. *Am J Clin Nutr* 1990;52:524–528
- Weickert MO, Möhlig M, Schöfl C, et al. Cereal fiber improves whole-body insulin sensitivity in overweight and obese women. *Diabetes Care* 2006;29:775–780
- Belobrajdic DP, Bird AR. The potential role of phytochemicals in wholegrain cereals for the prevention of type-2 diabetes. *Nutr J* 2013;12:62
- Aubertin-Leheudre M, Koskela A, Samaletdin A, Adlercreutz H. Plasma and urinary alkylresorcinol metabolites as potential biomarkers of breast cancer risk in Finnish women: a pilot study. *Nutr Cancer* 2010;62:759–764
- Marklund M, Strömberg EA, Lærke HN, et al. Simultaneous pharmacokinetic modeling of alkylresorcinols and their main metabolites indicates dual absorption mechanisms and enterohepatic elimination in humans. *J Nutr* 2014;144:1674–1680
